# Supplementary material for: Meta-analytic framework for modeling genetic coexpression dynamics
Source: publisher site journal article supplement (doi:10.1515/sagmb-2017-0052), 2019-02-01
Supplement: Supplementary file 1 [file Supplementary_Table1.pdf › Supplementary_Table1.pdf]

|    |      |     |      |     |      |
|----|------|-----|------|-----|------|
| 1  | ARGA | 51  | LIVF | 101 | THRB |
| 2  | ARGB | 52  | LIVG | 102 | TREB |
| 3  | ARGC | 53  | LIVH | 103 | TREC |
| 4  | ARGD | 54  | LIVJ | 104 | TRMJ |
| 5  | ARGF | 55  | LIVK | 105 | TRPC |
| 6  | ARGG | 56  | LIVM | 106 | TRPD |
| 7  | ARGH | 57  | LRP  | 107 | TRPE |
| 8  | ARNB | 58  | LYSA | 108 | TRPL |
| 9  | ARNC | 59  | LYSC | 109 | UBID |
| 10 | AROA | 60  | META | 110 | UCPA |
| 11 | AROG | 61  | METC | 111 | UXUA |
| 12 | AROP | 62  | METE | 112 | YBDL |
| 13 | ARTJ | 63  | METF | 113 | YBIC |
| 14 | BIOB | 64  | METL | 114 | YEED |
| 15 | BIOD | 65  | METQ | 115 | YHJE |
| 16 | BIOF | 66  | MODF | 116 | YICG |
| 17 | CBL  | 67  | MOG  | 117 | YIGA |
| 18 | CSGF | 68  | NADA |     |      |
| 19 | CVPA | 69  | NADB |     |      |
| 20 | CYSD | 70  | NLPA |     |      |
| 21 | CYSH | 71  | OMPT |     |      |
| 22 | CYSK | 72  | PCK  |     |      |
| 23 | CYSN | 73  | PHEA |     |      |
| 24 | CYSP | 74  | PHEL |     |      |
| 25 | CYSW | 75  | PNTA |     |      |
| 26 | DEOC | 76  | PNUC |     |      |
| 27 | ECO  | 77  | POTF |     |      |
| 28 | FDHE | 78  | POTG |     |      |
| 29 | FDOH | 79  | POTH |     |      |
| 30 | GCVB | 80  | PSIE |     |      |
| 31 | GCVH | 81  | PURC |     |      |
| 32 | GCVT | 82  | PURD |     |      |
| 33 | GDHA | 83  | PURF |     |      |
| 34 | GLTD | 84  | PURK |     |      |
| 35 | GNTX | 85  | PURM |     |      |
| 36 | GSID | 86  | RMF  |     |      |
| 37 | HISC | 87  | SDAC |     |      |
| 38 | HISD | 88  | SERA |     |      |
| 39 | HISG | 89  | SERC |     |      |
| 40 | HISJ | 90  | SPEC |     |      |
| 41 | HISL | 91  | TDH  |     |      |
| 42 | HISM | 92  | THIC |     |      |
| 43 | HISQ | 93  | THID |     |      |
| 44 | ILVH | 94  | THIE |     |      |
| 45 | ILVL | 95  | THIF |     |      |
| 46 | KBL  | 96  | THIG |     |      |
| 47 | LEUA | 97  | THIH |     |      |
| 48 | LEUB | 98  | THIM |     |      |
| 49 | LEUC | 99  | THIS |     |      |
| 50 | LEUD | 100 | THRA |     |      |
